# Supplementary material for: ROR functions as a ceRNA to regulate Nanog expression by sponging miR-145 and predicts poor prognosis in pancreatic cancer
Source: PubMed Central journal article supplement (PMC4811484; doi:10.18632/oncotarget.6450), 2015-12-02
Supplement: oncotarget-07-1608-s001.pdf [file oncotarget-07-1608-s001.pdf]

## ROR functions as a ceRNA to regulate Nanog expression by sponging miR-145 and predicts poor prognosis in pancreatic cancer

### Supplementary Material

**Supplementary Table 1.** The correlation between the lncRNA-ROR expression and clinicopathological factors in resectable PDAC (n=61)

|                              |                   | No. of cases | No. of patients (%) |           | P-Value        |
|------------------------------|-------------------|--------------|---------------------|-----------|----------------|
|                              |                   |              | ROR High            | ROR Low   |                |
| <b>Age</b>                   | ≤65               | 34           | 17(50.0%)           | 17(50.0%) | 1.0000         |
|                              | >65               | 27           | 14(51.8%)           | 13(49.2%) |                |
| <b>Gender</b>                | Male              | 32           | 15(46.9%)           | 17(53.1%) | 0.0520         |
|                              | Female            | 29           | 14(48.3%)           | 15(51.7%) |                |
| <b>Tumor Location</b>        | Head              | 35           | 18(51.4%)           | 17(48.6%) | 1.0000         |
|                              | Body and Tail     | 26           | 13(50.0%)           | 13(50.0%) |                |
| <b>Tumor Size</b>            | ≤4cm              | 38           | 29(76.3%)           | 9(23.7%)  | <b>0.0297*</b> |
|                              | >4cm              | 23           | 16(69.6%)           | 7(30.4%)  |                |
| <b>Nodal Metastasis</b>      | N0                | 46           | 23(50.0%)           | 23(50.0%) | 1.0000         |
|                              | N1-N3             | 15           | 8(69.6%)            | 7(30.4%)  |                |
| <b>CA19-9( IU/ml)</b>        | ≤500              | 19           | 9(47.4%)            | 10(52.6%) | 0.6545         |
|                              | >500              | 42           | 22(52.4%)           | 20(47.6%) |                |
| <b>TNM Stage</b>             | I and II          | 43           | 23(53.5%)           | 20(46.5%) | 0.8245         |
|                              | III and IV        | 18           | 10(55.6%)           | 8(44.4%)  |                |
| <b>Tumor Differentiation</b> | Well and Moderate | 39           | 20(51.3%)           | 19(48.7%) | 0.1320         |
|                              | Poor              | 22           | 12(54.5%)           | 10(45.5%) |                |

Abbreviations: PDAC, pancreatic duct adenocarcinoma.

\*This comparison was performed using Student's t-test.

**Supplementary Table 2. The qRT-PCR primers used in the study.**

|                   | <b>primers (5'→3')</b>                                                |
|-------------------|-----------------------------------------------------------------------|
| <b>lncRNA-ROR</b> | CCAGGACAATGAAACCAC (forward)<br>TGGAGCAGGTATGAGATT (reverse)          |
| <b>miR-145</b>    | GTCCAGTTTTCCCAGGAATCCCT (forward)<br>GCTGTCAACGATACGCTACCTA (reverse) |
| <b>18S rRNA</b>   | CAGCCACCCGAGATTGAGCA (forward)<br>TAGTAGCGACGGGCGGTGTG (reverse)      |

(A)

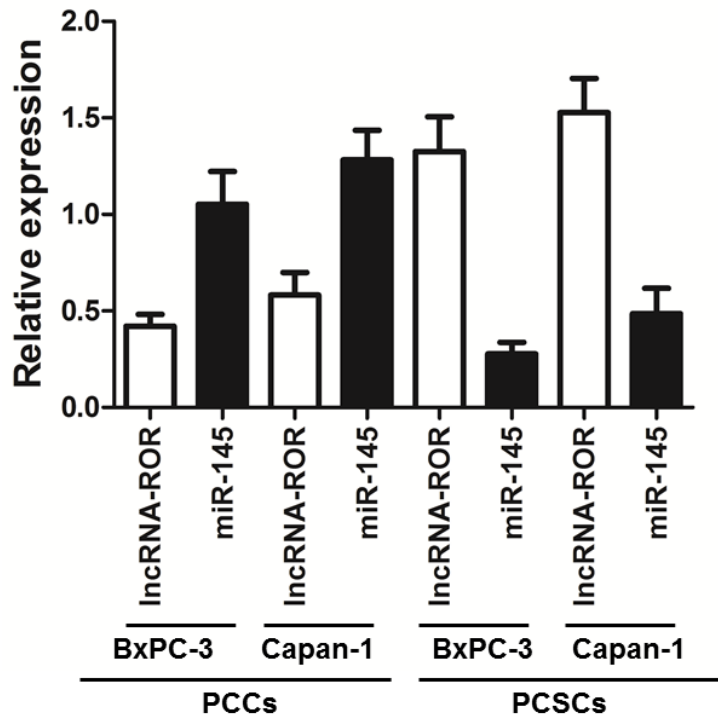

(B)

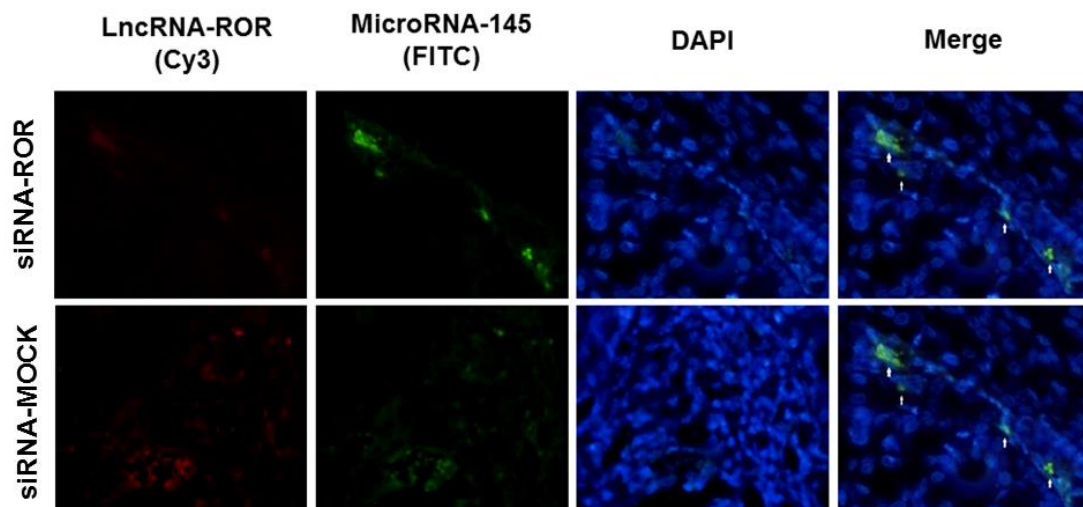

**Supplementary Figure 1. ROR and miR-145 expression are negatively correlated**

We examined the expression of the ROR and miR-145 in PCSCs and PCCs by qRT-PCR (A) and analyzed the ROR and miR-145 in serial sections of tissues by in Fluorescence in situ hybridization (B). The result is in agreement with the expression in PCSCs and PCCs, ROR silencing resulted in increased expression of miR-145, so we further confirm that the expression of lncRNA-ROR and microRNA-145 are negatively correlated.

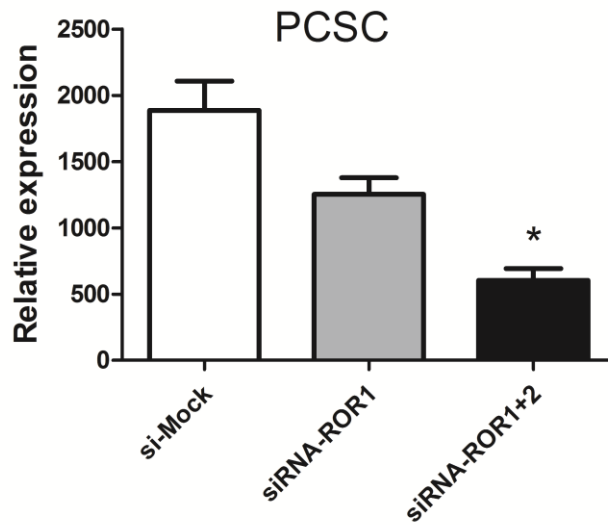

**Supplementary Figure 2. The confirmation of ROR expression in transfected pancreatic cancer stem cells.**

Although a validated siRNA (siROR-1) of ROR lncRNA has been demonstrated, we chose two siRNAs, siROR-1 and siROR-2, for the construction of the pGIPZROR-shRNA plasmids so as to exclude off-target effects. The pGIPZROR-shRNA vectors with an EGFP marker were then packaged into lentiviruses and transduced into human BxPC3 and Capan1 pancreatic cancer stem cells. We used two control cell lines: one with a mock virus carrying the empty vector and one without the virus. Then we detected ROR expression by qRT-PCR. The results indicated that the transfection efficiency of siROR-1 and siROR-2 is higher.

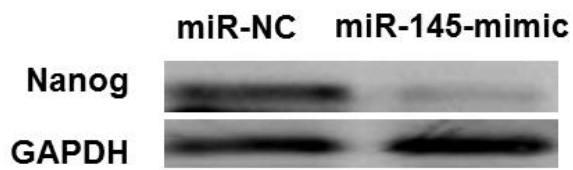

**Supplementary Figure 3. Nanog is a direct target of miR-145.**

We use western blot and luciferase reporter assay to confirm the expression between miR-145 and Nanog. To explore the function of miR-145 in the regulation of Nanog, PCSCs were transfected with miR-145 mimic. Then we detect the protein levels of Nanog by western blot, the result showed overexpression of miR-145 significantly inhibited Nanog expression.

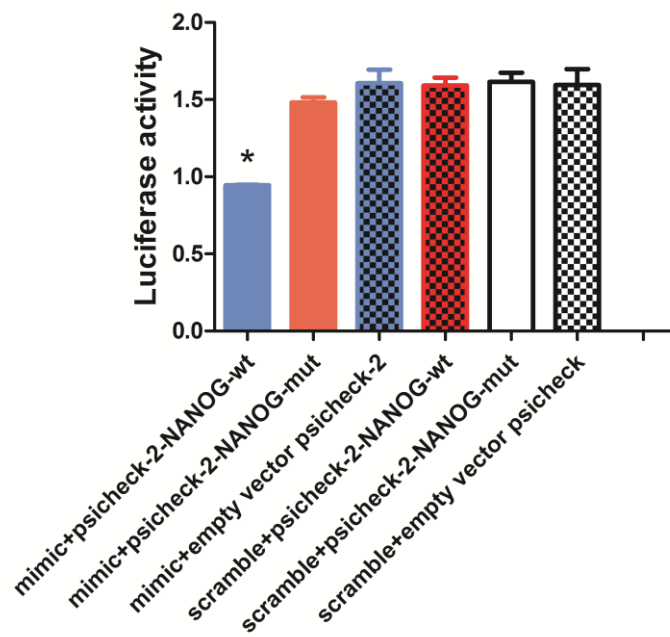

Luciferase reporter assay showed significantly lower luciferase activity compared with the control group when miR-145 and Nanog 785 bp-789 bp were overexpressed in the same cell line. Similarly, the Luciferase activity was significantly lower than the control group ( $p < 0.05$ ), when miR-145 and the Nanog mRNA 3' UTR were simultaneously overexpressed in the same cell line. These results suggested that miR-145 could induce posttranscriptional silencing of its target genes by binding to the Nanog mRNA 3' UTR or specific sites.
